# Supplementary material
Source: PubMed Central journal article supplement (PMC7265125)
Supplement: jamapediatr-174-e201316-s001.pdf [file jamapediatr-174-e201316-s001.pdf]

## Supplementary Online Content

Andersson NW, Torp-Pedersen C, Andersen JT. Association between fexofenadine use during pregnancy and fetal outcomes. *JAMA Pediatr*. Published online June 1, 2020. doi:10.1001/jamapediatrics.2020.1316

**eMethods.** Data Source and Excluded Birth Defects

**eTable 1.** Covariates Definition Included in Propensity Score and Data Sources

**eTable 2.** Number of Missing Values and Percentages (%) for the Unmatched Study Cohorts

**eTable 3.** Baseline Characteristics of Unmatched Pregnancy Cohorts of Fexofenadine and Cetirizine Users for Analyses of Primary Outcomes

**eTable 4.** Baseline Characteristics of Unmatched Pregnancy Cohorts of Fexofenadine and Cetirizine Users for Analyses of Secondary Outcomes

**eTable 5.** Baseline Characteristics of Propensity-Score Matched Pregnancy Cohorts of Fexofenadine and Cetirizine Users in 1:1 Ratio for Analyses of Secondary Outcomes

**eTable 6.** Standardized Differences for Comparison of Fexofenadine and Cetirizine Use During Pregnancy Before Propensity Score Matching

**eTable 7.** Standardized Differences for Comparison of Fexofenadine and Cetirizine Use During Pregnancy After Propensity Score Matching

**eTable 8.** Sensitivity Analyses of the Association Between Fexofenadine Use During Pregnancy and Primary Outcomes According to Restriction of Exposure Time Intervals, Singleton Pregnancies and Induced Abortions

**eTable 9.** Post hoc Analyses of the Association Between Fexofenadine Use During Pregnancy and Spontaneous Abortion, Preterm Birth, Small Size for Gestational Age, and Stillbirth According to Ending Exposure Window Prior to Start of Follow-up

**eFigure.** Overview of the Exposure and Outcome Time Periods for the Specific Outcome Analyses

**eReferences.**

This supplementary material has been provided by the authors to give readers additional information about their work.

## **eMethods.**

### **Data Sources.**

We linked individual-level data between the various data sources using the unique person identification number assigned to all inhabitants in Denmark. All registries utilized for this study have nationwide coverage in Denmark. Information on study medication were obtained through the Registry of Medicinal Product Statistics. Ever since 1995 data on all filled prescriptions (including anatomical therapeutic chemical [ATC] code and date of filled prescriptions) at Danish pharmacies have been registered in the Registry of Medicinal Product Statistics.<sup>1</sup> From the Medical Birth Registry, we obtained information on live births and stillbirths, while information on pregnancies with abortive outcomes was attained from the National Patient Registry. Ever since 1968 the Medical Birth Registry has contained records of all births and data on birth-related and maternal-related variables, including information on gestational age, which is estimated based on maternal report of the first day of last menstrual period.<sup>2</sup> The gestational age is subsequently ultrasonographical confirmed at the antenatal screening. For pregnancies with abortive outcomes, information on gestational age was obtained from the National Patient Registry. Ever since 1977, the National Patient Registry has contained information on records of inpatient admissions, outpatient- and emergency department contacts; all with physician-assigned diagnoses coded according to International Classification of Diseases version 10 (ICD-10) since 1994.<sup>3</sup> From this registry, we attained information on previous pregnancy history of birth defects and abortive outcomes. For demographic data, we used the Central Person Registry (established in 1968) and socio-economic data was attained from Statistics Denmark.<sup>4</sup> All registries are continuously updated.

### **Excluded birth defects.**

Information on birth defects was obtained from the National Patient Registry. Based on the physician-assigned diagnoses recorded during the infants first year of life we excluded minor defects according EUROCAT exclusion list and defects of known causes: chromosomal aberrations (ICD-10: Q90-99), genetic syndromes (ICD-10: Q447B, Q619A, Q751, Q754, Q771, Q772, Q780, Q796, Q85, Q87), malformation syndromes with known causes (ICD-10: Q86).<sup>5</sup>

**eTable 1. Covariates definition included in propensity score and data sources.**

| <b>Variable</b>                                                    | <b>Categories</b>                                                                                                               | <b>Data source</b>                                   |
|--------------------------------------------------------------------|---------------------------------------------------------------------------------------------------------------------------------|------------------------------------------------------|
| <b>Pregnancy characteristics</b>                                   |                                                                                                                                 |                                                      |
| Age at pregnancy onset                                             | ≤19, 20-24, 25-29, 30-34, ≥35                                                                                                   | Central Person Registry                              |
| Marital status or living with partner                              | yes/no                                                                                                                          | Central Person Registry                              |
| Place of birth                                                     | Denmark, Europe, Outside of Europe                                                                                              | Central Person Registry                              |
| Region of residence                                                | The Capital Region of Denmark, Region Zealand, The Region of Southern Denmark, Central Denmark Region, The North Denmark Region | Central Person Registry                              |
| Gross household income                                             | Quartiles                                                                                                                       | Statistic Denmark                                    |
| Education level, years                                             | <12, 12-13, 14-15, >15                                                                                                          | Statistic Denmark                                    |
| Parity <sup>a</sup>                                                | 1,2, ≥3                                                                                                                         | Medical Birth Registry                               |
| Multiple birth pregnancy <sup>a</sup>                              | yes/no                                                                                                                          | Medical Birth Registry                               |
| Season of conception                                               | Winter, Spring, Summer, Autumn                                                                                                  | Medical Birth Registry and National Patient Registry |
| Smoking during pregnancy <sup>a</sup>                              | yes/no                                                                                                                          | Medical Birth Registry                               |
| Previous pregnancy with the same fetal outcome <sup>b</sup>        | yes/no                                                                                                                          | Medical Birth Registry and National Patient Registry |
| <b>Prescription drug use in past year prior to pregnancy onset</b> |                                                                                                                                 |                                                      |
|                                                                    | <i>ATC codes</i>                                                                                                                |                                                      |
| Antacids, H <sub>2</sub> -blockers, and PPIs                       | A02A, A02BA, A02BC                                                                                                              | Registry of Medicinal Product Statistics             |
| Insulin                                                            | A10A                                                                                                                            | Registry of Medicinal Product Statistics             |
| Oral antidiabetic drugs                                            | A10B                                                                                                                            | Registry of Medicinal Product Statistics             |
| Antihypertensives                                                  | C03A, C03C, C03D, C03E, C07, C08C, C08D, C09A-C09D                                                                              | Registry of Medicinal Product Statistics             |
| Topical corticosteroids group II <sup>c</sup>                      | D07AB, D07BB, D07CB, D07XB                                                                                                      | Registry of Medicinal Product Statistics             |
| Topical corticosteroids group III <sup>c</sup>                     | D07AC, D07BC, D07CC, D07XC                                                                                                      | Registry of Medicinal Product Statistics             |
| Topical corticosteroids group IV <sup>c</sup>                      | D07AD                                                                                                                           | Registry of Medicinal Product Statistics             |
| Oral corticosteroids                                               | H02AB                                                                                                                           | Registry of Medicinal Product Statistics             |
| Thyroid drugs                                                      | H03A, H03B                                                                                                                      | Registry of Medicinal Product Statistics             |
| NSAIDs                                                             | M01A except M01AX                                                                                                               | Registry of Medicinal Product Statistics             |
| Opiates                                                            | N02A                                                                                                                            | Registry of Medicinal Product Statistics             |
| Antimigraine drugs                                                 | N02C                                                                                                                            | Registry of Medicinal Product Statistics             |
| Antidepressants                                                    | N06A                                                                                                                            | Registry of Medicinal Product Statistics             |
| Nasal corticosteroids                                              | R01AD                                                                                                                           | Registry of Medicinal Product Statistics             |

(eTable 1. Continued)

| <b>Variable</b>                                                        | <b>Categories</b>                                    | <b>Data source</b>                       |
|------------------------------------------------------------------------|------------------------------------------------------|------------------------------------------|
| Pulmonary inhalants                                                    | R03AC, R03AK, R03AL, R03BA, R03BB                    | Registry of Medicinal Product Statistics |
| Leukotriene receptor antagonists                                       | R03DC                                                | Registry of Medicinal Product Statistics |
| Other second-generation antihistamines <sup>d</sup>                    | R06AE09, R06AX13, R06AX18, R06AX22, R06AX27, R06AX29 | Registry of Medicinal Product Statistics |
| Ophthalmological antiallergics                                         | S01G                                                 | Registry of Medicinal Product Statistics |
| No. of drugs used                                                      | 0, 1-2, 3-4, ≥5                                      | Registry of Medicinal Product Statistics |
| <b>Hospital care utilization in past year prior to pregnancy onset</b> |                                                      |                                          |
| No. of hospitalization                                                 | 0, 1-2, ≥3                                           | National Patient Registry                |
| No. of outpatient contacts                                             | 0, 1-2, ≥3                                           | National Patient Registry                |

ATC: anatomic therapeutic chemical; NSAID: non-steroid anti-inflammatory drug; PPIs: proton pump inhibitors. <sup>a</sup>Covariate was available for analyses on live births only. <sup>b</sup>The individual previous adverse fetal outcome variable was included for the specific outcome analysis. <sup>c</sup>Group II-IV denotes the strength of the respective topical corticosteroid preparations. <sup>d</sup>Loratadine (ATC code: R06AX13) was removed from this variable in sensitivity analyses of fexofenadine compared with loratadine exposed pregnancies.

**eTable 2. Number of missing values (percentages) for the unmatched study cohorts.**

| <b>Variable</b>                                                                    | <b>For analysis of major birth defects (n=9203)</b> | <b>For analysis of spontaneous abortion (n=16,236)</b> | <b>For analysis of preterm birth (n=18,565)</b> | <b>For analysis of small size for gestational age (n=19,321)</b> | <b>For analysis of stillbirth (n=22,331)</b> |
|------------------------------------------------------------------------------------|-----------------------------------------------------|--------------------------------------------------------|-------------------------------------------------|------------------------------------------------------------------|----------------------------------------------|
| <b>Pregnancy characteristics</b>                                                   |                                                     |                                                        |                                                 |                                                                  |                                              |
| Age at pregnancy onset                                                             | 0                                                   | 0                                                      | 0                                               | 0                                                                | 0                                            |
| Marital status or living with partner                                              | 18 (0.2)                                            | 64 (0.4)                                               | 73 (0.4)                                        | 78 (0.4)                                                         | 102 (0.5)                                    |
| Place of birth                                                                     | 0                                                   | 0                                                      | 1 (0.0)                                         | 1 (0.0)                                                          | 1 (0.0)                                      |
| Region of residence                                                                | 0                                                   | 0                                                      | 0                                               | 0                                                                | 0                                            |
| Gross household income                                                             | 0                                                   | 0                                                      | 0                                               | 0                                                                | 0                                            |
| Education level                                                                    | 263 (2.9)                                           | 493 (3.0)                                              | 576 (3.1)                                       | 609 (3.2)                                                        | 708 (3.2)                                    |
| Parity                                                                             | 71 (0.8)                                            | NA                                                     | 149 (0.8)                                       | 153 (0.8)                                                        | NA                                           |
| Multiple birth pregnancy                                                           | 0                                                   | NA                                                     | 0                                               | 0                                                                | NA                                           |
| Season of conception                                                               | 0                                                   | 0                                                      | 0                                               | 0                                                                | 0                                            |
| Smoking during pregnancy                                                           | 149 (1.6)                                           | NA                                                     | 342 (1.8)                                       | 352 (1.8)                                                        | NA                                           |
| Previous pregnancy with the same fetal outcome                                     | 0                                                   | 0                                                      | 0                                               | 0                                                                | 0                                            |
| <b>Prescription drug use in past year prior to pregnancy onset<sup>a</sup></b>     | 0                                                   | 0                                                      | 0                                               | 0                                                                | 0                                            |
| <b>Hospital care utilization in past year prior to pregnancy onset<sup>b</sup></b> | 0                                                   | 0                                                      | 0                                               | 0                                                                | 0                                            |

NA: not available. <sup>a</sup>No missing values for any drug use in the past year. <sup>b</sup>No missing values for any health care utilization in past year.

**eTable 3. Baseline characteristics of unmatched pregnancy cohorts of fexofenadine and cetirizine users for analyses of primary outcomes. Values are numbers (percentages).**

| Pregnancy characteristics                                  | Unmatched cohort for analysis of major birth defects |                           | Unmatched cohort for analysis of spontaneous abortion |                             |
|------------------------------------------------------------|------------------------------------------------------|---------------------------|-------------------------------------------------------|-----------------------------|
|                                                            | Fexofenadine users (n=3011)                          | Cetirizine users (n=6192) | Fexofenadine users (n=4928)                           | Cetirizine users (n=11,308) |
| Gestational age at first filled prescription, median (IQR) | 7 (-12-34)                                           | 22 (-6-51)                | 17 (-9-62)                                            | 41 (3-95)                   |
| Age at pregnancy onset                                     |                                                      |                           |                                                       |                             |
| ≤19                                                        | 21 (0.7)                                             | 64 (1.0)                  | 119 (2.4)                                             | 279 (2.5)                   |
| 20-24                                                      | 297 (9.9)                                            | 597 (9.6)                 | 567 (11.5)                                            | 1255 (11.1)                 |
| 25-29                                                      | 981 (32.6)                                           | 1998 (32.3)               | 1491 (30.3)                                           | 3359 (29.7)                 |
| 30-34                                                      | 1088 (36.1)                                          | 2263 (36.5)               | 1607 (32.6)                                           | 3910 (34.6)                 |
| ≥35                                                        | 624 (20.7)                                           | 1270 (20.5)               | 1144 (23.2)                                           | 2505 (22.2)                 |
| Married or living with partner                             | 2611 (86.7)                                          | 5423 (87.6)               | 4025 (81.7)                                           | 9409 (83.2)                 |
| Place of birth                                             |                                                      |                           |                                                       |                             |
| Denmark                                                    | 2619 (87.0)                                          | 5259 (84.9)               | 4261 (86.5)                                           | 9544 (84.4)                 |
| Europe                                                     | 144 (4.8)                                            | 293 (4.7)                 | 237 (4.8)                                             | 534 (4.7)                   |
| Outside of Europe                                          | 248 (8.2)                                            | 640 (10.3)                | 430 (8.7)                                             | 1230 (10.9)                 |
| Region of residence                                        |                                                      |                           |                                                       |                             |
| The Capital Region of Denmark                              | 928 (30.8)                                           | 1848 (29.8)               | 2257 (45.8)                                           | 4659 (41.2)                 |
| Region Zealand                                             | 321 (10.7)                                           | 829 (13.4)                | 406 (8.2)                                             | 1277 (11.3)                 |
| The Region of Southern Denmark                             | 608 (20.2)                                           | 1273 (20.6)               | 751 (15.2)                                            | 1975 (17.5)                 |
| Central Denmark Region                                     | 825 (27.4)                                           | 1623 (26.2)               | 1063 (21.6)                                           | 2505 (22.2)                 |
| The North Denmark Region                                   | 329 (10.9)                                           | 619 (10.0)                | 451 (9.2)                                             | 892 (7.9)                   |
| Gross household income, quartile                           |                                                      |                           |                                                       |                             |
| 1                                                          | 746 (24.8)                                           | 1555 (25.1)               | 1261 (25.6)                                           | 2798 (24.7)                 |
| 2                                                          | 772 (25.6)                                           | 1529 (24.7)               | 1242 (25.2)                                           | 2817 (24.9)                 |
| 3                                                          | 736 (24.4)                                           | 1565 (25.3)               | 1200 (24.4)                                           | 2859 (25.3)                 |
| 4                                                          | 757 (25.1)                                           | 1543 (24.9)               | 1225 (24.9)                                           | 2834 (25.1)                 |
| Education level, years                                     |                                                      |                           |                                                       |                             |
| <12                                                        | 594 (19.7)                                           | 1352 (21.8)               | 1172 (23.8)                                           | 2843 (25.1)                 |
| 12-13                                                      | 437 (14.5)                                           | 905 (14.6)                | 729 (14.8)                                            | 1684 (14.9)                 |
| 14-15                                                      | 744 (24.7)                                           | 1539 (24.9)               | 1134 (23.0)                                           | 2711 (24.0)                 |
| >15                                                        | 1237 (41.1)                                          | 2396 (38.7)               | 1893 (38.4)                                           | 4070 (36.0)                 |
| Parity                                                     |                                                      |                           |                                                       |                             |
| 1                                                          | 1454 (48.3)                                          | 2984 (48.2)               | NA                                                    | NA                          |
| 2                                                          | 1020 (33.9)                                          | 2107 (33.9)               | NA                                                    | NA                          |
| ≥3                                                         | 537 (17.8)                                           | 1101 (17.8)               | NA                                                    | NA                          |
| Multiple birth pregnancy                                   | 111 (3.7)                                            | 272 (4.4)                 | NA                                                    | NA                          |
| Season of conception                                       |                                                      |                           |                                                       |                             |
| Winter                                                     | 521 (17.3)                                           | 1135 (18.3)               | 1133 (23.0)                                           | 3143 (27.8)                 |
| Spring                                                     | 1054 (35.0)                                          | 2528 (40.8)               | 1610 (32.7)                                           | 3937 (34.8)                 |
| Summer                                                     | 979 (32.5)                                           | 1630 (26.3)               | 1404 (28.5)                                           | 2481 (21.9)                 |
| Autumn                                                     | 457 (15.2)                                           | 899 (14.5)                | 781 (15.9)                                            | 1747 (15.5)                 |
| Smoking during pregnancy                                   | 343 (11.4)                                           | 781 (12.6)                | NA                                                    | NA                          |
| Previous pregnancy with the same fetal outcome             | 67 (2.2)                                             | 116 (1.9)                 | 759 (15.4)                                            | 1847 (16.3)                 |

(eTable 3. Continued)

|                                                                        | Unmatched cohort for analysis of major birth defects |                           | Unmatched cohort for analysis of spontaneous abortion |                             |
|------------------------------------------------------------------------|------------------------------------------------------|---------------------------|-------------------------------------------------------|-----------------------------|
|                                                                        | Fexofenadine users (n=3011)                          | Cetirizine users (n=6192) | Fexofenadine users (n=4928)                           | Cetirizine users (n=11,308) |
| <b>Prescription drug use in past year prior to pregnancy onset</b>     |                                                      |                           |                                                       |                             |
| Antacids, H <sub>2</sub> -blockers, and PPIs                           | 271 (9.0)                                            | 530 (8.6)                 | 470 (9.5)                                             | 935 (8.3)                   |
| Insulin                                                                | 11 (0.4)                                             | 40 (0.7)                  | 22 (0.5)                                              | 69 (0.6)                    |
| Oral antidiabetic drugs                                                | 61 (2.0)                                             | 132 (2.1)                 | 88 (1.8)                                              | 217 (1.9)                   |
| Antihypertensives                                                      | 80 (2.7)                                             | 174 (2.8)                 | 140 (2.8)                                             | 327 (2.9)                   |
| Topical corticosteroids group II                                       | 309 (10.3)                                           | 563 (9.1)                 | 471 (9.6)                                             | 981 (8.7)                   |
| Topical corticosteroids group III                                      | 374 (12.4)                                           | 693 (11.2)                | 578 (11.7)                                            | 1153 (10.2)                 |
| Topical corticosteroids group IV                                       | 94 (3.1)                                             | 125 (2.0)                 | 139 (2.8)                                             | 213 (1.9)                   |
| Oral corticosteroids                                                   | 387 (12.9)                                           | 548 (8.9)                 | 610 (12.4)                                            | 999 (8.8)                   |
| Thyroid drugs                                                          | 65 (2.2)                                             | 128 (2.1)                 | 103 (2.1)                                             | 234 (2.1)                   |
| NSAIDs                                                                 | 663 (22.0)                                           | 1325 (21.4)               | 1091 (22.1)                                           | 2390 (21.1)                 |
| Opiates                                                                | 169 (5.6)                                            | 348 (5.6)                 | 302 (6.1)                                             | 664 (5.9)                   |
| Antimigraine drugs                                                     | 110 (3.7)                                            | 230 (3.7)                 | 181 (3.7)                                             | 399 (3.5)                   |
| Antidepressants                                                        | 282 (9.4)                                            | 500 (8.1)                 | 518 (10.5)                                            | 1020 (9.0)                  |
| Nasal corticosteroids                                                  | 743 (24.7)                                           | 1570 (25.4)               | 1158 (23.5)                                           | 2643 (23.4)                 |
| Pulmonary inhalants                                                    | 623 (20.7)                                           | 1282 (20.7)               | 961 (19.5)                                            | 2230 (19.7)                 |
| Leukotriene receptor antagonists                                       | 81 (2.7)                                             | 90 (1.5)                  | 128 (2.6)                                             | 158 (1.4)                   |
| Other second-generation antihistamines                                 | 319 (10.6)                                           | 746 (12.1)                | 501 (10.2)                                            | 1288 (11.4)                 |
| Ophthalmological antiallergics                                         | 654 (21.7)                                           | 1275 (20.6)               | 1014 (20.6)                                           | 2171 (19.2)                 |
| No. of drugs used                                                      |                                                      |                           |                                                       |                             |
| 1-2                                                                    | 1466 (48.6)                                          | 2974 (47.9)               | 2313 (46.9)                                           | 5376 (47.5)                 |
| 3-4                                                                    | 645 (21.4)                                           | 1270 (20.5)               | 1050 (21.3)                                           | 2175 (19.2)                 |
| ≥5                                                                     | 175 (5.8)                                            | 313 (5.0)                 | 285 (5.8)                                             | 551 (4.9)                   |
| <b>Hospital care utilization in past year prior to pregnancy onset</b> |                                                      |                           |                                                       |                             |
| No. of hospitalization                                                 |                                                      |                           |                                                       |                             |
| 1                                                                      | 329 (11.0)                                           | 685 (11.1)                | 560 (11.4)                                            | 1361 (12.0)                 |
| 2                                                                      | 63 (2.1)                                             | 153 (2.5)                 | 120 (2.4)                                             | 282 (2.5)                   |
| ≥3                                                                     | 22 (0.7)                                             | 57 (0.9)                  | 44 (0.9)                                              | 107 (1.0)                   |
| No. of outpatient contacts                                             |                                                      |                           |                                                       |                             |
| 1                                                                      | 500 (16.6)                                           | 946 (15.3)                | 817 (16.6)                                            | 1756 (15.5)                 |
| 2                                                                      | 203 (6.7)                                            | 380 (6.1)                 | 341 (6.9)                                             | 721 (6.4)                   |
| ≥3                                                                     | 110 (3.7)                                            | 194 (3.1)                 | 177 (3.6)                                             | 384 (3.4)                   |

IQR: Interquartile range; NA: not available; NSAID: non-steroid anti-inflammatory drug; PPIs: proton pump inhibitors.

**eTable 4. Baseline characteristics of unmatched pregnancy cohorts of fexofenadine and cetirizine users for analyses of secondary outcomes. Values are numbers (percentages).**

| Pregnancy characteristics                                  | Unmatched cohort for analysis of preterm birth |                             | Unmatched cohort for analysis of small size for gestational age |                             | Unmatched cohort for analysis of stillbirth |                             |
|------------------------------------------------------------|------------------------------------------------|-----------------------------|-----------------------------------------------------------------|-----------------------------|---------------------------------------------|-----------------------------|
|                                                            | Fexofenadine users (n=4957)                    | Cetirizine users (n=13,608) | Fexofenadine users (n=5138)                                     | Cetirizine users (n=14,183) | Fexofenadine users (n=6195)                 | Cetirizine users (n=16,136) |
| Gestational age at first filled prescription, median (IQR) | 50 (0-144)                                     | 99 (27-174)                 | 56 (2-156)                                                      | 106 (31-185)                | 36 (-3-133)                                 | 86 (19-174)                 |
| Age at pregnancy onset                                     |                                                |                             |                                                                 |                             |                                             |                             |
| ≤19                                                        | 36 (0.7)                                       | 158 (1.2)                   | 40 (0.8)                                                        | 167 (1.2)                   | 130 (2.1)                                   | 346 (2.1)                   |
| 20-24                                                      | 486 (9.8)                                      | 1364 (10.0)                 | 510 (9.9)                                                       | 1460 (10.3)                 | 694 (11.2)                                  | 1794 (11.1)                 |
| 25-29                                                      | 1578 (31.8)                                    | 4260 (31.3)                 | 1646 (32.0)                                                     | 4446 (31.4)                 | 1877 (30.3)                                 | 4856 (30.1)                 |
| 30-34                                                      | 1800 (36.3)                                    | 4953 (36.4)                 | 1855 (36.1)                                                     | 5150 (36.3)                 | 2077 (33.5)                                 | 5663 (35.1)                 |
| ≥35                                                        | 1057 (21.3)                                    | 2873 (21.1)                 | 1087 (21.2)                                                     | 2960 (20.9)                 | 1417 (22.9)                                 | 3477 (21.6)                 |
| Married or living with partner                             | 4279 (86.3)                                    | 11774 (86.5)                | 4437 (86.4)                                                     | 12290 (86.7)                | 5108 (82.5)                                 | 13581 (84.2)                |
| Place of birth                                             |                                                |                             |                                                                 |                             |                                             |                             |
| Denmark                                                    | 4305 (86.9)                                    | 11573 (85.1)                | 4453 (86.7)                                                     | 12059 (85.0)                | 5345 (86.3)                                 | 13668 (84.7)                |
| Europe                                                     | 241 (4.9)                                      | 657 (4.8)                   | 256 (5.0)                                                       | 685 (4.8)                   | 307 (5.0)                                   | 770 (4.8)                   |
| Outside of Europe                                          | 410 (8.3)                                      | 1378 (10.1)                 | 429 (8.4)                                                       | 1439 (10.2)                 | 543 (8.8)                                   | 1698 (10.5)                 |
| Region of residence                                        |                                                |                             |                                                                 |                             |                                             |                             |
| The Capital Region of Denmark                              | 1543 (31.1)                                    | 4036 (29.7)                 | 1589 (30.9)                                                     | 4158 (29.3)                 | 2622 (42.3)                                 | 6038 (37.4)                 |
| Region Zealand                                             | 516 (10.4)                                     | 1847 (13.6)                 | 530 (10.3)                                                      | 1920 (13.5)                 | 534 (8.6)                                   | 1932 (12.0)                 |
| The Region of Southern Denmark                             | 932 (18.8)                                     | 2911 (21.4)                 | 971 (18.9)                                                      | 3067 (21.6)                 | 979 (15.8)                                  | 3092 (19.2)                 |
| Central Denmark Region                                     | 1332 (26.9)                                    | 3569 (26.2)                 | 1379 (26.8)                                                     | 3734 (26.3)                 | 1384 (22.3)                                 | 3757 (23.3)                 |
| The North Denmark Region                                   | 634 (12.8)                                     | 1245 (9.2)                  | 669 (13.0)                                                      | 1304 (9.2)                  | 676 (10.9)                                  | 1317 (8.2)                  |
| Gross household income, quartile                           |                                                |                             |                                                                 |                             |                                             |                             |
| 1                                                          | 1208 (24.4)                                    | 3434 (25.2)                 | 1252 (24.4)                                                     | 3580 (25.2)                 | 1585 (25.6)                                 | 3998 (24.8)                 |
| 2                                                          | 1259 (25.4)                                    | 3382 (24.9)                 | 1307 (25.4)                                                     | 3522 (24.8)                 | 1563 (25.2)                                 | 4020 (24.9)                 |
| 3                                                          | 1243 (25.1)                                    | 3398 (25.0)                 | 1280 (24.9)                                                     | 3550 (25.0)                 | 1509 (24.4)                                 | 4074 (25.3)                 |
| 4                                                          | 1247 (25.2)                                    | 3394 (24.9)                 | 1299 (25.3)                                                     | 3531 (24.9)                 | 1538 (24.8)                                 | 4044 (25.1)                 |
| Education level, years                                     |                                                |                             |                                                                 |                             |                                             |                             |
| <12                                                        | 979 (19.8)                                     | 2998 (22.0)                 | 1021 (19.9)                                                     | 3120 (22.0)                 | 1419 (22.9)                                 | 3892 (24.1)                 |
| 12-13                                                      | 694 (14.0)                                     | 1997 (14.7)                 | 715 (13.9)                                                      | 2083 (14.7)                 | 893 (14.4)                                  | 2394 (14.8)                 |
| 14-15                                                      | 1208 (24.4)                                    | 3338 (24.5)                 | 1248 (24.3)                                                     | 3490 (24.6)                 | 1439 (23.2)                                 | 3878 (24.0)                 |
| >15                                                        | 2076 (41.9)                                    | 5275 (38.8)                 | 2154 (41.9)                                                     | 5490 (38.7)                 | 2444 (39.5)                                 | 5972 (37.0)                 |
| Parity                                                     |                                                |                             |                                                                 |                             |                                             |                             |
| 1                                                          | 2367 (47.8)                                    | 6350 (46.7)                 | 2463 (47.9)                                                     | 6663 (47.0)                 | NA                                          | NA                          |
| 2                                                          | 1724 (34.8)                                    | 4718 (34.7)                 | 1778 (34.6)                                                     | 4898 (34.5)                 | NA                                          | NA                          |
| ≥3                                                         | 866 (17.5)                                     | 2540 (18.7)                 | 897 (17.5)                                                      | 2622 (18.5)                 | NA                                          | NA                          |
| Multiple birth pregnancy                                   | 205 (4.1)                                      | 661 (4.9)                   | 204 (4.0)                                                       | 668 (4.7)                   | NA                                          | NA                          |
| Season of conception                                       |                                                |                             |                                                                 |                             |                                             |                             |
| Winter                                                     | 1294 (26.1)                                    | 3967 (29.2)                 | 1332 (25.9)                                                     | 4050 (28.6)                 | 1510 (24.4)                                 | 4397 (27.3)                 |
| Spring                                                     | 1381 (27.9)                                    | 3694 (27.2)                 | 1408 (27.4)                                                     | 3787 (26.7)                 | 1779 (28.7)                                 | 4504 (27.9)                 |
| Summer                                                     | 1264 (25.5)                                    | 2554 (18.8)                 | 1298 (25.3)                                                     | 2739 (19.3)                 | 1630 (26.3)                                 | 3303 (20.5)                 |
| Autumn                                                     | 1018 (20.5)                                    | 3393 (24.9)                 | 1100 (21.4)                                                     | 3607 (25.4)                 | 1276 (20.6)                                 | 3932 (24.4)                 |
| Smoking during pregnancy                                   | 579 (11.7)                                     | 1662 (12.2)                 | 606 (11.8)                                                      | 1722 (12.1)                 | NA                                          | NA                          |
| Previous pregnancy with the same fetal outcome             | 191 (3.9)                                      | 533 (3.9)                   | 299 (5.8)                                                       | 713 (5.0)                   | 17 (0.3)                                    | 60 (0.4)                    |



(eTable 4. Continued)

|                                                                        | Unmatched cohort for analysis of preterm birth |                             | Unmatched cohort for analysis of small size for gestational age |                             | Unmatched cohort for analysis of stillbirth |                             |
|------------------------------------------------------------------------|------------------------------------------------|-----------------------------|-----------------------------------------------------------------|-----------------------------|---------------------------------------------|-----------------------------|
|                                                                        | Fexofenadine users (n=4957)                    | Cetirizine users (n=13,608) | Fexofenadine users (n=5138)                                     | Cetirizine users (n=14,183) | Fexofenadine users (n=6195)                 | Cetirizine users (n=16,136) |
| <b>Prescription drug use in past year prior to pregnancy onset</b>     |                                                |                             |                                                                 |                             |                                             |                             |
| Antacids, H <sub>2</sub> -blockers, and PPIs                           | 421 (8.5)                                      | 1069 (7.9)                  | 428 (8.3)                                                       | 1095 (7.7)                  | 559 (9.0)                                   | 1278 (7.9)                  |
| Insulin                                                                | 26 (0.5)                                       | 76 (0.6)                    | 26 (0.5)                                                        | 76 (0.5)                    | 31 (0.5)                                    | 88 (0.6)                    |
| Oral antidiabetic drugs                                                | 104 (2.1)                                      | 286 (2.1)                   | 105 (2.0)                                                       | 297 (2.1)                   | 114 (1.8)                                   | 312 (1.9)                   |
| Antihypertensives                                                      | 129 (2.6)                                      | 355 (2.6)                   | 134 (2.6)                                                       | 363 (2.6)                   | 175 (2.8)                                   | 434 (2.7)                   |
| Topical corticosteroids group II                                       | 412 (8.3)                                      | 1061 (7.8)                  | 422 (8.2)                                                       | 1087 (7.7)                  | 532 (8.6)                                   | 1277 (7.9)                  |
| Topical corticosteroids group III                                      | 558 (11.3)                                     | 1280 (9.4)                  | 575 (11.2)                                                      | 1306 (9.2)                  | 694 (11.2)                                  | 1512 (9.4)                  |
| Topical corticosteroids group IV                                       | 127 (2.6)                                      | 243 (1.8)                   | 129 (2.5)                                                       | 250 (1.8)                   | 161 (2.6)                                   | 290 (1.8)                   |
| Oral corticosteroids                                                   | 574 (11.6)                                     | 1177 (8.7)                  | 581 (11.3)                                                      | 1213 (8.6)                  | 709 (11.4)                                  | 1378 (8.5)                  |
| Thyroid drugs                                                          | 105 (2.1)                                      | 265 (2.0)                   | 107 (2.1)                                                       | 273 (1.9)                   | 130 (2.1)                                   | 314 (2.0)                   |
| NSAIDs                                                                 | 1048 (21.1)                                    | 2795 (20.5)                 | 1082 (21.1)                                                     | 2904 (20.5)                 | 1327 (21.4)                                 | 3333 (20.7)                 |
| Opiates                                                                | 272 (5.5)                                      | 744 (5.5)                   | 279 (5.4)                                                       | 759 (5.4)                   | 370 (6.0)                                   | 910 (5.6)                   |
| Antimigraine drugs                                                     | 172 (3.5)                                      | 467 (3.4)                   | 175 (3.4)                                                       | 476 (3.4)                   | 218 (3.5)                                   | 551 (3.4)                   |
| Antidepressants                                                        | 422 (8.5)                                      | 1077 (7.9)                  | 431 (8.4)                                                       | 1112 (7.8)                  | 597 (9.6)                                   | 1366 (8.5)                  |
| Nasal corticosteroids                                                  | 1126 (22.7)                                    | 2941 (21.6)                 | 1144 (22.3)                                                     | 3004 (21.2)                 | 1368 (22.1)                                 | 3428 (21.2)                 |
| Pulmonary inhalants                                                    | 940 (19.0)                                     | 2412 (17.7)                 | 951 (18.5)                                                      | 2471 (17.4)                 | 1141 (18.4)                                 | 2881 (17.9)                 |
| Leukotriene receptor antagonists                                       | 104 (2.1)                                      | 156 (1.2)                   | 104 (2.0)                                                       | 158 (1.1)                   | 136 (2.2)                                   | 190 (1.2)                   |
| Other second-generation antihistamines                                 | 465 (9.4)                                      | 1550 (11.4)                 | 470 (9.2)                                                       | 1583 (11.2)                 | 582 (9.4)                                   | 1746 (10.8)                 |
| Ophthalmological antiallergics                                         | 982 (19.8)                                     | 2446 (18.0)                 | 997 (19.4)                                                      | 2509 (17.7)                 | 1196 (19.3)                                 | 2869 (17.8)                 |
| No. of drugs used                                                      |                                                |                             |                                                                 |                             |                                             |                             |
| 1-2                                                                    | 2320 (46.8)                                    | 6411 (47.1)                 | 2403 (46.8)                                                     | 6664 (47.0)                 | 2881 (46.5)                                 | 7592 (47.1)                 |
| 3-4                                                                    | 990 (20.0)                                     | 2438 (17.9)                 | 1000 (19.5)                                                     | 2489 (17.6)                 | 1230 (19.9)                                 | 2864 (17.8)                 |
| ≥5                                                                     | 235 (4.7)                                      | 569 (4.2)                   | 236 (4.6)                                                       | 576 (4.1)                   | 313 (5.1)                                   | 684 (4.2)                   |
| <b>Hospital care utilization in past year prior to pregnancy onset</b> |                                                |                             |                                                                 |                             |                                             |                             |
| No. of hospitalization                                                 |                                                |                             |                                                                 |                             |                                             |                             |
| 1                                                                      | 551 (11.1)                                     | 1568 (11.5)                 | 567 (11.0)                                                      | 1642 (11.6)                 | 691 (11.2)                                  | 1909 (11.8)                 |
| 2                                                                      | 108 (2.2)                                      | 318 (2.3)                   | 114 (2.2)                                                       | 333 (2.4)                   | 148 (2.4)                                   | 390 (2.4)                   |
| ≥3                                                                     | 40 (0.8)                                       | 112 (0.8)                   | 40 (0.8)                                                        | 116 (0.8)                   | 53 (0.9)                                    | 138 (0.9)                   |
| No. of outpatient contacts                                             |                                                |                             |                                                                 |                             |                                             |                             |
| 1                                                                      | 803 (16.2)                                     | 2098 (15.4)                 | 831 (16.2)                                                      | 2176 (15.3)                 | 1013 (16.4)                                 | 2487 (15.4)                 |
| 2                                                                      | 335 (6.8)                                      | 816 (6.0)                   | 344 (6.7)                                                       | 850 (6.0)                   | 416 (6.7)                                   | 986 (6.1)                   |
| ≥3                                                                     | 166 (3.4)                                      | 447 (3.3)                   | 172 (3.4)                                                       | 464 (3.3)                   | 214 (3.5)                                   | 531 (3.3)                   |

IQR: Interquartile range; NA: not available; NSAID: non-steroid anti-inflammatory drug; PPIs: proton pump inhibitors.

**eTable 5. Baseline characteristics of propensity-score matched pregnancy cohorts of fexofenadine and cetirizine users in 1:1 ratio for analyses of secondary outcomes. Values are numbers (percentages).**

| Pregnancy characteristics                                  | Matched cohort for analysis of preterm birth |                           | Matched cohort for analysis of small size for gestational age |                           | Matched cohort for analysis of stillbirth |                           |
|------------------------------------------------------------|----------------------------------------------|---------------------------|---------------------------------------------------------------|---------------------------|-------------------------------------------|---------------------------|
|                                                            | Fexofenadine users (n=4933)                  | Cetirizine users (n=4933) | Fexofenadine users (n=5110)                                   | Cetirizine users (n=5110) | Fexofenadine users (n=6153)               | Cetirizine users (n=6153) |
| Gestational age at first filled prescription, median (IQR) | 51 (1-144)                                   | 52 (1-146)                | 57 (2-157)                                                    | 60 (4-157)                | 37 (-2-134)                               | 36 (-2-130)               |
| Age at pregnancy onset                                     |                                              |                           |                                                               |                           |                                           |                           |
| ≤19                                                        | 36 (0.7)                                     | 31 (0.6)                  | 40 (0.8)                                                      | 44 (0.9)                  | 130 (2.1)                                 | 134 (2.2)                 |
| 20-24                                                      | 482 (9.8)                                    | 470 (9.5)                 | 506 (9.9)                                                     | 504 (9.9)                 | 689 (11.2)                                | 692 (11.3)                |
| 25-29                                                      | 1574 (31.9)                                  | 1573 (31.9)               | 1636 (32.0)                                                   | 1653 (32.4)               | 1863 (30.3)                               | 1822 (29.6)               |
| 30-34                                                      | 1792 (36.3)                                  | 1808 (36.7)               | 1849 (36.2)                                                   | 1808 (35.4)               | 2066 (33.6)                               | 2054 (33.4)               |
| ≥35                                                        | 1049 (21.3)                                  | 1051 (21.3)               | 1079 (21.1)                                                   | 1101 (21.6)               | 1405 (22.8)                               | 1451 (23.6)               |
| Married or living with partner                             | 4257 (86.3)                                  | 4278 (86.7)               | 4411 (86.3)                                                   | 4421 (86.5)               | 5074 (82.5)                               | 5095 (82.8)               |
| Place of birth                                             |                                              |                           |                                                               |                           |                                           |                           |
| Denmark                                                    | 4282 (86.8)                                  | 4274 (86.6)               | 4427 (86.6)                                                   | 4427 (86.6)               | 5304 (86.2)                               | 5317 (86.4)               |
| Europe                                                     | 241 (4.9)                                    | 237 (4.8)                 | 254 (5.0)                                                     | 253 (5.0)                 | 306 (5.0)                                 | 295 (4.8)                 |
| Outside of Europe                                          | 410 (8.3)                                    | 422 (8.6)                 | 429 (8.4)                                                     | 430 (8.4)                 | 543 (8.8)                                 | 541 (8.8)                 |
| Region of residence                                        |                                              |                           |                                                               |                           |                                           |                           |
| The Capital Region of Denmark                              | 1538 (31.2)                                  | 1579 (32.0)               | 1582 (31.0)                                                   | 1585 (31.0)               | 2602 (42.3)                               | 2583 (42.0)               |
| Region Zealand                                             | 516 (10.5)                                   | 490 (9.9)                 | 530 (10.4)                                                    | 476 (9.3)                 | 534 (8.7)                                 | 515 (8.4)                 |
| The Region of Southern Denmark                             | 931 (18.9)                                   | 920 (18.7)                | 970 (19.0)                                                    | 965 (18.9)                | 976 (15.9)                                | 1008 (16.4)               |
| Central Denmark Region                                     | 1330 (27.0)                                  | 1302 (26.4)               | 1375 (26.9)                                                   | 1383 (27.1)               | 1377 (22.4)                               | 1392 (22.6)               |
| The North Denmark Region                                   | 618 (12.5)                                   | 642 (13.0)                | 653 (12.8)                                                    | 701 (13.7)                | 664 (10.8)                                | 655 (10.7)                |
| Gross household income, quartile                           |                                              |                           |                                                               |                           |                                           |                           |
| 1                                                          | 1205 (24.4)                                  | 1206 (24.5)               | 1246 (24.4)                                                   | 1251 (24.5)               | 1574 (25.6)                               | 1586 (25.8)               |
| 2                                                          | 1252 (25.4)                                  | 1262 (25.6)               | 1300 (25.4)                                                   | 1276 (25.0)               | 1554 (25.3)                               | 1553 (25.2)               |
| 3                                                          | 1239 (25.1)                                  | 1231 (25.0)               | 1275 (25.0)                                                   | 1278 (25.0)               | 1497 (24.3)                               | 1485 (24.1)               |
| 4                                                          | 1237 (25.1)                                  | 1234 (25.0)               | 1289 (25.2)                                                   | 1305 (25.5)               | 1528 (24.8)                               | 1529 (24.9)               |
| Education level, years                                     |                                              |                           |                                                               |                           |                                           |                           |
| <12                                                        | 974 (19.7)                                   | 988 (20.0)                | 1017 (19.9)                                                   | 1005 (19.7)               | 1412 (23.0)                               | 1440 (23.4)               |
| 12-13                                                      | 692 (14.0)                                   | 682 (13.8)                | 714 (14.0)                                                    | 684 (13.4)                | 886 (14.4)                                | 889 (14.4)                |
| 14-15                                                      | 1203 (24.4)                                  | 1192 (24.2)               | 1240 (24.3)                                                   | 1233 (24.1)               | 1432 (23.3)                               | 1421 (23.1)               |
| >15                                                        | 2064 (41.8)                                  | 2071 (42.0)               | 2139 (41.9)                                                   | 2188 (42.8)               | 2423 (39.4)                               | 2403 (39.1)               |
| Parity                                                     |                                              |                           |                                                               |                           |                                           |                           |
| 1                                                          | 2356 (47.8)                                  | 2337 (47.4)               | 2450 (48.0)                                                   | 2448 (47.9)               | NA                                        | NA                        |
| 2                                                          | 1713 (34.7)                                  | 1711 (34.7)               | 1767 (34.6)                                                   | 1807 (35.4)               | NA                                        | NA                        |
| ≥3                                                         | 864 (17.5)                                   | 885 (17.9)                | 893 (17.5)                                                    | 855 (16.7)                | NA                                        | NA                        |
| Multiple birth pregnancy                                   | 204 (4.1)                                    | 155 (3.1)                 | 204 (4.0)                                                     | 160 (3.1)                 | NA                                        | NA                        |
| Season of conception                                       |                                              |                           |                                                               |                           |                                           |                           |
| Winter                                                     | 1291 (26.2)                                  | 1308 (26.5)               | 1327 (26.0)                                                   | 1339 (26.2)               | 1505 (24.5)                               | 1495 (24.3)               |
| Spring                                                     | 1379 (28.0)                                  | 1377 (27.9)               | 1403 (27.5)                                                   | 1404 (27.5)               | 1768 (28.7)                               | 1769 (28.8)               |
| Summer                                                     | 1246 (25.3)                                  | 1240 (25.1)               | 1281 (25.1)                                                   | 1255 (24.6)               | 1610 (26.2)                               | 1630 (26.5)               |
| Autumn                                                     | 1017 (20.6)                                  | 1008 (20.4)               | 1099 (21.5)                                                   | 1112 (21.8)               | 1270 (20.6)                               | 1259 (20.5)               |
| Smoking during pregnancy                                   | 577 (11.7)                                   | 571 (11.6)                | 604 (11.8)                                                    | 602 (11.8)                | NA                                        | NA                        |
| Previous pregnancy with the same fetal outcome             | 190 (3.9)                                    | 184 (3.7)                 | 297 (5.8)                                                     | 300 (5.9)                 | 17 (0.3)                                  | 15 (0.2)                  |

(eTable 5. Continued)

|                                                                        | Matched cohort for analysis of preterm birth |                           | Matched cohort for analysis of small size for gestational age |                           | Matched cohort for analysis of stillbirth |                           |
|------------------------------------------------------------------------|----------------------------------------------|---------------------------|---------------------------------------------------------------|---------------------------|-------------------------------------------|---------------------------|
|                                                                        | Fexofenadine users (n=4933)                  | Cetirizine users (n=4933) | Fexofenadine users (n=5110)                                   | Cetirizine users (n=5110) | Fexofenadine users (n=6153)               | Cetirizine users (n=6153) |
| <b>Prescription drug use in past year prior to pregnancy onset</b>     |                                              |                           |                                                               |                           |                                           |                           |
| Antacids, H <sub>2</sub> -blockers, and PPIs                           | 416 (8.4)                                    | 388 (7.9)                 | 424 (8.4)                                                     | 430 (8.4)                 | 546 (8.9)                                 | 530 (8.6)                 |
| Insulin                                                                | 26 (0.5)                                     | 32 (0.7)                  | 26 (0.5)                                                      | 29 (0.6)                  | 31 (0.5)                                  | 30 (0.5)                  |
| Oral antidiabetic drugs                                                | 104 (2.1)                                    | 99 (2.0)                  | 105 (2.1)                                                     | 120 (2.4)                 | 114 (1.9)                                 | 120 (2.0)                 |
| Antihypertensives                                                      | 127 (2.6)                                    | 125 (2.5)                 | 131 (2.6)                                                     | 124 (2.4)                 | 170 (2.8)                                 | 165 (2.7)                 |
| Topical corticosteroids group II                                       | 411 (8.3)                                    | 406 (8.2)                 | 418 (8.2)                                                     | 418 (8.2)                 | 527 (8.6)                                 | 531 (8.6)                 |
| Topical corticosteroids group III                                      | 555 (11.3)                                   | 552 (11.2)                | 568 (11.1)                                                    | 565 (11.1)                | 676 (11.0)                                | 658 (10.7)                |
| Topical corticosteroids group IV                                       | 123 (2.5)                                    | 115 (2.3)                 | 123 (2.4)                                                     | 134 (2.4)                 | 151 (2.5)                                 | 159 (2.6)                 |
| Oral corticosteroids                                                   | 562 (11.4)                                   | 529 (10.7)                | 568 (11.1)                                                    | 530 (10.4)                | 684 (11.1)                                | 674 (11.0)                |
| Thyroid drugs                                                          | 103 (2.1)                                    | 99 (2.0)                  | 106 (2.1)                                                     | 103 (2.0)                 | 128 (2.1)                                 | 128 (2.1)                 |
| NSAIDs                                                                 | 1044 (21.2)                                  | 1016 (20.6)               | 1075 (21.0)                                                   | 1064 (20.8)               | 1315 (21.4)                               | 1311 (21.3)               |
| Opiates                                                                | 271 (5.5)                                    | 255 (5.2)                 | 276 (5.4)                                                     | 278 (5.4)                 | 366 (6.0)                                 | 349 (5.7)                 |
| Antimigraine drugs                                                     | 171 (3.5)                                    | 178 (3.6)                 | 175 (3.4)                                                     | 177 (3.5)                 | 217 (3.5)                                 | 219 (3.6)                 |
| Antidepressants                                                        | 419 (8.5)                                    | 381 (7.7)                 | 430 (8.4)                                                     | 403 (7.9)                 | 591 (9.6)                                 | 588 (9.6)                 |
| Nasal corticosteroids                                                  | 1120 (22.7)                                  | 1099 (22.3)               | 1136 (22.2)                                                   | 1110 (21.7)               | 1353 (22.0)                               | 1328 (21.6)               |
| Pulmonary inhalants                                                    | 930 (18.9)                                   | 948 (19.2)                | 940 (18.4)                                                    | 942 (18.4)                | 1123 (18.3)                               | 1148 (18.7)               |
| Leukotriene receptor antagonists                                       | 99 (2.0)                                     | 102 (2.1)                 | 95 (1.9)                                                      | 82 (1.6)                  | 119 (1.9)                                 | 107 (1.7)                 |
| Other second-generation antihistamines                                 | 463 (9.4)                                    | 460 (9.3)                 | 466 (9.1)                                                     | 421 (8.2)                 | 577 (9.4)                                 | 555 (9.0)                 |
| Ophthalmological antiallergics                                         | 972 (19.7)                                   | 962 (19.5)                | 989 (19.4)                                                    | 959 (18.8)                | 1181 (19.2)                               | 1181 (19.2)               |
| <b>No. of drugs used</b>                                               |                                              |                           |                                                               |                           |                                           |                           |
| 1-2                                                                    | 2314 (46.9)                                  | 2306 (46.8)               | 2391 (46.8)                                                   | 2362 (46.2)               | 2870 (46.6)                               | 2871 (46.7)               |
| 3-4                                                                    | 982 (19.9)                                   | 948 (19.2)                | 991 (19.4)                                                    | 970 (19.0)                | 1213 (19.7)                               | 1196 (19.4)               |
| ≥5                                                                     | 230 (4.7)                                    | 227 (4.6)                 | 231 (4.5)                                                     | 227 (4.4)                 | 299 (4.9)                                 | 297 (4.8)                 |
| <b>Hospital care utilization in past year prior to pregnancy onset</b> |                                              |                           |                                                               |                           |                                           |                           |
| <b>No. of hospitalization</b>                                          |                                              |                           |                                                               |                           |                                           |                           |
| 1                                                                      | 549 (11.1)                                   | 543 (11.0)                | 565 (11.1)                                                    | 535 (10.5)                | 684 (11.1)                                | 686 (11.2)                |
| 2                                                                      | 107 (2.2)                                    | 98 (2.0)                  | 114 (2.2)                                                     | 109 (2.1)                 | 146 (2.4)                                 | 136 (2.2)                 |
| ≥3                                                                     | 40 (0.8)                                     | 40 (0.8)                  | 40 (0.8)                                                      | 33 (0.7)                  | 51 (0.8)                                  | 56 (0.9)                  |
| <b>No. of outpatient contacts</b>                                      |                                              |                           |                                                               |                           |                                           |                           |
| 1                                                                      | 802 (16.3)                                   | 780 (15.8)                | 825 (16.1)                                                    | 846 (16.6)                | 1001 (16.3)                               | 980 (15.9)                |
| 2                                                                      | 330 (6.7)                                    | 328 (6.7)                 | 340 (6.7)                                                     | 323 (6.3)                 | 407 (6.6)                                 | 395 (6.4)                 |
| ≥3                                                                     | 164 (3.3)                                    | 159 (3.2)                 | 171 (3.4)                                                     | 157 (3.1)                 | 210 (3.4)                                 | 227 (3.7)                 |

IQR: Interquartile range; NA: not available; NSAID: non-steroid anti-inflammatory drug; PPIs: proton pump inhibitors.

**eTable 6. Standardized differences for comparison of fexofenadine and cetirizine use during pregnancy before propensity score matching. Values are percentages (%).**

|                                                | For analysis of major birth defects | For analysis of spontaneous abortion | For analysis of preterm birth | For analysis of SGA | For analysis of stillbirth |
|------------------------------------------------|-------------------------------------|--------------------------------------|-------------------------------|---------------------|----------------------------|
| <b>Pregnancy characteristics</b>               |                                     |                                      |                               |                     |                            |
| Age at pregnancy onset                         |                                     |                                      |                               |                     |                            |
| ≤19                                            | 3.6                                 | 0.3                                  | 4.5                           | 4.1                 | 0.3                        |
| 20-24                                          | 0.8                                 | 1.3                                  | 0.7                           | 1.2                 | 0.3                        |
| 25-29                                          | 0.7                                 | 1.2                                  | 1.1                           | 1.5                 | 0.5                        |
| 30-34                                          | 0.9                                 | 4.2                                  | 0.2                           | 0.4                 | 3.3                        |
| ≥35                                            | 0.5                                 | 2.5                                  | 0.5                           | 0.7                 | 3.2                        |
| Married or living with partner                 | 2.6                                 | 4.0                                  | 0.6                           | 0.9                 | 4.6                        |
| Place of birth                                 |                                     |                                      |                               |                     |                            |
| Denmark                                        | 5.9                                 | 5.9                                  | 5.2                           | 4.7                 | 4.5                        |
| Europe                                         | 0.2                                 | 0.4                                  | 0.2                           | 0.7                 | 0.9                        |
| Outside of Europe                              | 7.2                                 | 7.2                                  | 6.4                           | 6.2                 | 6.0                        |
| Region of residence                            |                                     |                                      |                               |                     |                            |
| The Capital Region of Denmark                  | 2.1                                 | 9.3                                  | 3.2                           | 3.5                 | 10.0                       |
| Region Zealand                                 | 8.4                                 | 10.3                                 | 9.8                           | 10.0                | 11.1                       |
| The Region of Southern Denmark                 | 0.9                                 | 6.0                                  | 6.5                           | 6.8                 | 8.9                        |
| Central Denmark Region                         | 2.7                                 | 1.4                                  | 1.5                           | 1.2                 | 2.3                        |
| The North Denmark Region                       | 3.0                                 | 4.5                                  | 11.7                          | 12.2                | 9.4                        |
| Gross household income, quartile               |                                     |                                      |                               |                     |                            |
| 1                                              | 0.8                                 | 2.0                                  | 2.0                           | 2.0                 | 1.9                        |
| 2                                              | 2.2                                 | 0.7                                  | 1.3                           | 1.4                 | 0.7                        |
| 3                                              | 1.9                                 | 2.2                                  | 0.2                           | 0.3                 | 2.1                        |
| 4                                              | 0.5                                 | 0.5                                  | 0.5                           | 0.9                 | 0.5                        |
| Education level, years                         |                                     |                                      |                               |                     |                            |
| <12                                            | 5.2                                 | 3.2                                  | 5.6                           | 5.2                 | 2.9                        |
| 12-13                                          | 0.3                                 | 0.3                                  | 1.9                           | 2.2                 | 1.2                        |
| 14-15                                          | 0.4                                 | 2.3                                  | 0.4                           | 0.7                 | 1.9                        |
| >15                                            | 4.9                                 | 5.0                                  | 6.4                           | 6.6                 | 5.0                        |
| Parity                                         |                                     |                                      |                               |                     |                            |
| 1                                              | 0.2                                 | NA                                   | 2.2                           | 1.9                 | NA                         |
| 2                                              | 0.3                                 | NA                                   | 0.2                           | 0.2                 | NA                         |
| ≥3                                             | 0.1                                 | NA                                   | 3.1                           | 2.7                 | NA                         |
| Multiple birth pregnancy                       | 3.6                                 | NA                                   | 3.5                           | 3.6                 | NA                         |
| Season of conception                           |                                     |                                      |                               |                     |                            |
| Winter                                         | 2.7                                 | 11.1                                 | 6.8                           | 5.9                 | 6.6                        |
| Spring                                         | 12.0                                | 4.5                                  | 1.6                           | 1.6                 | 1.8                        |
| Summer                                         | 13.6                                | 15.1                                 | 16.3                          | 14.3                | 13.8                       |
| Autumn                                         | 1.9                                 | 1.1                                  | 10.5                          | 9.5                 | 9.0                        |
| Smoking during pregnancy                       | 3.8                                 | NA                                   | 1.6                           | 1.1                 | NA                         |
| Previous pregnancy with the same fetal outcome | 3.0                                 | 2.6                                  | 0.3                           | 3.5                 | 1.7                        |

(eTable 6. Continued)

|                                                                        | For analysis of major birth defects | For analysis of spontaneous abortion | For analysis of preterm birth | For analysis of SGA | For analysis of stillbirth |
|------------------------------------------------------------------------|-------------------------------------|--------------------------------------|-------------------------------|---------------------|----------------------------|
| <b>Prescription drug use in past year prior to pregnancy onset</b>     |                                     |                                      |                               |                     |                            |
| Antacids, H <sub>2</sub> -blockers, and PPIs                           | 1.6                                 | 4.5                                  | 2.3                           | 2.2                 | 4.0                        |
| Insulin                                                                | 4.0                                 | 2.3                                  | 0.5                           | 0.4                 | 0.7                        |
| Oral antidiabetic drugs                                                | 0.7                                 | 1.0                                  | 0.0                           | 0.4                 | 1.4                        |
| Antihypertensives                                                      | 0.9                                 | 0.3                                  | 0.0                           | 0.3                 | 0.6                        |
| Topical corticosteroids group II                                       | 4.0                                 | 3.1                                  | 1.9                           | 2.0                 | 2.5                        |
| Topical corticosteroids group III                                      | 3.8                                 | 4.9                                  | 6.1                           | 6.6                 | 6.0                        |
| Topical corticosteroids group IV                                       | 7.0                                 | 6.2                                  | 5.3                           | 5.2                 | 5.5                        |
| Oral corticosteroids                                                   | 12.9                                | 11.5                                 | 9.7                           | 9.2                 | 9.7                        |
| Thyroid drugs                                                          | 0.6                                 | 0.2                                  | 1.2                           | 1.1                 | 0.8                        |
| NSAIDs                                                                 | 1.5                                 | 2.4                                  | 1.5                           | 1.4                 | 1.1                        |
| Opiates                                                                | 0.0                                 | 1.1                                  | 0.1                           | 0.4                 | 1.4                        |
| Antimigraine drugs                                                     | 0.3                                 | 0.8                                  | 0.2                           | 0.3                 | 4.1                        |
| Antidepressants                                                        | 4.6                                 | 5.0                                  | 2.2                           | 2.0                 | 4.0                        |
| Nasal corticosteroids                                                  | 1.6                                 | 0.3                                  | 2.7                           | 2.6                 | 2.0                        |
| Pulmonary inhalants                                                    | 0.0                                 | 0.6                                  | 3.2                           | 2.8                 | 1.5                        |
| Leukotriene receptor antagonists                                       | 8.7                                 | 8.6                                  | 7.5                           | 7.3                 | 7.9                        |
| Other second-generation antihistamines                                 | 4.6                                 | 4.0                                  | 6.7                           | 6.7                 | 4.7                        |
| Ophthalmological antiallergics                                         | 2.8                                 | 3.5                                  | 4.7                           | 4.4                 | 3.9                        |
| No. of drugs used                                                      |                                     |                                      |                               |                     |                            |
| 1-2                                                                    | 1.4                                 | 1.2                                  | 0.6                           | 0.4                 | 1.1                        |
| 3-4                                                                    | 2.2                                 | 5.2                                  | 5.3                           | 4.9                 | 5.4                        |
| ≥5                                                                     | 3.3                                 | 4.1                                  | 2.7                           | 2.6                 | 3.9                        |
| <b>Hospital care utilization in past year prior to pregnancy onset</b> |                                     |                                      |                               |                     |                            |
| No. of hospitalization                                                 |                                     |                                      |                               |                     |                            |
| 1                                                                      | 0.4                                 | 2.1                                  | 1.7                           | 1.7                 | 2.1                        |
| 2                                                                      | 2.5                                 | 0.4                                  | 1.3                           | 0.9                 | 0.2                        |
| ≥3                                                                     | 2.1                                 | 0.6                                  | 1.1                           | 0.4                 | 0.0                        |
| No. of outpatient contacts                                             |                                     |                                      |                               |                     |                            |
| 1                                                                      | 3.6                                 | 4.1                                  | 3.7                           | 2.3                 | 2.6                        |
| 2                                                                      | 2.5                                 | 2.9                                  | 2.1                           | 2.9                 | 2.5                        |
| ≥3                                                                     | 2.9                                 | 1.1                                  | 3.1                           | 0.4                 | 0.9                        |

NA: not available; NSAID: non-steroid anti-inflammatory drug; PPIs: proton pump inhibitors.

**eTable 7. Standardized differences for comparison of fexofenadine and cetirizine use during pregnancy after propensity score matching. Values are percentages (%).**

|                                                | For analysis of major birth defects | For analysis of spontaneous abortion | For analysis of preterm birth | For analysis of SGA | For analysis of stillbirth |
|------------------------------------------------|-------------------------------------|--------------------------------------|-------------------------------|---------------------|----------------------------|
| <b>Pregnancy characteristics</b>               |                                     |                                      |                               |                     |                            |
| Age at pregnancy onset                         |                                     |                                      |                               |                     |                            |
| ≤19                                            | 1.5                                 | 1.6                                  | 1.2                           | 0.9                 | 0.5                        |
| 20-24                                          | 0.6                                 | 0.5                                  | 0.8                           | 0.1                 | 0.2                        |
| 25-29                                          | 1.9                                 | 0.6                                  | 0.0                           | 0.7                 | 1.5                        |
| 30-34                                          | 1.8                                 | 0.9                                  | 0.7                           | 1.7                 | 0.4                        |
| ≥35                                            | 0.0                                 | 0.1                                  | 0.1                           | 1.1                 | 1.8                        |
| Married or living with partner                 | 0.2                                 | 0.2                                  | 1.3                           | 0.6                 | 0.9                        |
| Place of birth                                 |                                     |                                      |                               |                     |                            |
| Denmark                                        | 1.9                                 | 0.0                                  | 0.5                           | 0.0                 | 0.6                        |
| Europe                                         | 1.6                                 | 0.8                                  | 0.4                           | 0.1                 | 0.8                        |
| Outside of Europe                              | 1.1                                 | 0.6                                  | 0.9                           | 0.1                 | 0.1                        |
| Region of residence                            |                                     |                                      |                               |                     |                            |
| The Capital Region of Denmark                  | 0.9                                 | 2.0                                  | 1.8                           | 0.1                 | 0.6                        |
| Region Zealand                                 | 1.0                                 | 1.6                                  | 1.7                           | 3.6                 | 1.1                        |
| The Region of Southern Denmark                 | 0.0                                 | 1.9                                  | 0.6                           | 0.3                 | 1.4                        |
| Central Denmark Region                         | 1.4                                 | 0.1                                  | 1.3                           | 0.4                 | 0.6                        |
| The North Denmark Region                       | 0.2                                 | 0.6                                  | 1.5                           | 2.8                 | 0.5                        |
| Gross household income, quartile               |                                     |                                      |                               |                     |                            |
| 1                                              | 0.6                                 | 0.9                                  | 0.1                           | 0.2                 | 0.5                        |
| 2                                              | 1.9                                 | 0.9                                  | 0.5                           | 1.1                 | 0.0                        |
| 3                                              | 3.3                                 | 1.1                                  | 0.4                           | 0.1                 | 0.5                        |
| 4                                              | 0.9                                 | 1.1                                  | 0.1                           | 0.7                 | 0.0                        |
| Education level, years                         |                                     |                                      |                               |                     |                            |
| <12                                            | 0.6                                 | 1.9                                  | 0.7                           | 0.6                 | 1.1                        |
| 12-13                                          | 1.6                                 | 1.8                                  | 0.6                           | 1.7                 | 0.1                        |
| 14-15                                          | 1.5                                 | 1.1                                  | 0.5                           | 0.3                 | 0.4                        |
| >15                                            | 1.9                                 | 0.6                                  | 0.3                           | 1.9                 | 0.7                        |
| Parity                                         |                                     |                                      |                               |                     |                            |
| 1                                              | 0.9                                 | NA                                   | 0.8                           | 0.1                 | NA                         |
| 2                                              | 1.1                                 | NA                                   | 0.1                           | 1.6                 | NA                         |
| ≥3                                             | 0.2                                 | NA                                   | 1.1                           | 2.0                 | NA                         |
| Multiple birth pregnancy                       | 6.2                                 | NA                                   | 5.3                           | 4.7                 | NA                         |
| Season of conception                           |                                     |                                      |                               |                     |                            |
| Winter                                         | 0.2                                 | 1.8                                  | 0.8                           | 0.5                 | 0.4                        |
| Spring                                         | 2.3                                 | 0.6                                  | 0.1                           | 0.0                 | 0.0                        |
| Summer                                         | 2.7                                 | 1.0                                  | 0.3                           | 1.2                 | 0.7                        |
| Autumn                                         | 0.2                                 | 0.1                                  | 0.5                           | 0.6                 | 0.4                        |
| Smoking during pregnancy                       | 2.0                                 | NA                                   | 0.4                           | 0.1                 | NA                         |
| Previous pregnancy with the same fetal outcome | 1.4                                 | 0.1                                  | 0.6                           | 0.3                 | 0.6                        |

(eTable 7. Continued)

|                                                                        | For analysis of major birth defects | For analysis of spontaneous abortion | For analysis of preterm birth | For analysis of SGA | For analysis of stillbirth |
|------------------------------------------------------------------------|-------------------------------------|--------------------------------------|-------------------------------|---------------------|----------------------------|
| <b>Prescription drug use in past year prior to pregnancy onset</b>     |                                     |                                      |                               |                     |                            |
| Antacids, H <sub>2</sub> -blockers, and PPIs                           | 0.9                                 | 0.3                                  | 2.1                           | 0.4                 | 0.9                        |
| Insulin                                                                | 2.0                                 | 0.6                                  | 1.6                           | 0.8                 | 0.2                        |
| Oral antidiabetic drugs                                                | 1.2                                 | 2.3                                  | 0.7                           | 2.0                 | 0.7                        |
| Antihypertensives                                                      | 2.0                                 | 1.0                                  | 0.3                           | 0.9                 | 0.5                        |
| Topical corticosteroids group II                                       | 0.5                                 | 0.8                                  | 0.4                           | 0.0                 | 0.2                        |
| Topical corticosteroids group III                                      | 3.4                                 | 0.3                                  | 0.2                           | 0.2                 | 0.9                        |
| Topical corticosteroids group IV                                       | 2.6                                 | 0.1                                  | 1.1                           | 0.1                 | 0.8                        |
| Oral corticosteroids                                                   | 1.3                                 | 1.5                                  | 2.1                           | 2.4                 | 0.5                        |
| Thyroid drugs                                                          | 1.9                                 | 1.1                                  | 0.6                           | 0.4                 | 0.0                        |
| NSAIDs                                                                 | 0.4                                 | 0.5                                  | 1.4                           | 0.5                 | 0.2                        |
| Opiates                                                                | 1.5                                 | 1.2                                  | 1.4                           | 0.2                 | 1.2                        |
| Antimigraine drugs                                                     | 1.8                                 | 0.3                                  | 0.8                           | 0.2                 | 0.2                        |
| Antidepressants                                                        | 0.6                                 | 1.5                                  | 2.8                           | 1.9                 | 0.2                        |
| Nasal corticosteroids                                                  | 0.7                                 | 0.5                                  | 1.0                           | 1.2                 | 1.0                        |
| Pulmonary inhalants                                                    | 2.2                                 | 1.3                                  | 0.9                           | 0.1                 | 1.1                        |
| Leukotriene receptor antagonists                                       | 2.0                                 | 0.4                                  | 0.4                           | 2.0                 | 1.5                        |
| Other second-generation antihistamines                                 | 1.8                                 | 0.9                                  | 0.2                           | 3.1                 | 1.2                        |
| Ophthalmological antiallergics                                         | 0.3                                 | 0.2                                  | 0.5                           | 1.5                 | 0.0                        |
| No. of drugs used                                                      |                                     |                                      |                               |                     |                            |
| 1-2                                                                    | 2.0                                 | 0.4                                  | 0.3                           | 1.5                 | 0.0                        |
| 3-4                                                                    | 0.6                                 | 0.1                                  | 1.7                           | 2.6                 | 0.7                        |
| ≥5                                                                     | 1.2                                 | 1.4                                  | 0.3                           | 0.9                 | 0.2                        |
| <b>Hospital care utilization in past year prior to pregnancy onset</b> |                                     |                                      |                               |                     |                            |
| No. of hospitalization                                                 |                                     |                                      |                               |                     |                            |
| 1                                                                      | 1.0                                 | 0.3                                  | 0.4                           | 1.9                 | 0.1                        |
| 2                                                                      | 1.4                                 | 0.1                                  | 1.3                           | 0.7                 | 1.1                        |
| ≥3                                                                     | 1.5                                 | 0.2                                  | 0.0                           | 1.6                 | 0.9                        |
| No. of outpatient contacts                                             |                                     |                                      |                               |                     |                            |
| 1                                                                      | 0.9                                 | 0.4                                  | 1.2                           | 1.1                 | 0.9                        |
| 2                                                                      | 0.1                                 | 1.4                                  | 0.2                           | 1.4                 | 0.8                        |
| ≥3                                                                     | 1.8                                 | 0.8                                  | 0.6                           | 1.6                 | 1.5                        |

NA: not available; NSAID: non-steroid anti-inflammatory drug; PPIs: proton pump inhibitors.

**eTable 8. Sensitivity analyses of the association between fexofenadine use during pregnancy and primary outcomes according to restriction of exposure time intervals, singleton pregnancies and induced abortions.**

| <b>Major birth defects</b>                    | <b>No. with outcome/total no. (%)</b> | <b>Prevalence Odds Ratio (95% CI)</b> |
|-----------------------------------------------|---------------------------------------|---------------------------------------|
| <b>Exposure interval limited to day 0-84</b>  |                                       |                                       |
| Fexofenadine                                  | 67/1751 (3.8%)                        | 1.01 (0.72-1.43)                      |
| Cetirizine                                    | 67/1773 (3.8%)                        | 1.00 (reference)                      |
| <b>Singleton pregnancies only</b>             |                                       |                                       |
| Fexofenadine                                  | 112/2853 (3.9%)                       | 1.09 (0.83-1.43)                      |
| Cetirizine                                    | 104/2885 (3.6%)                       | 1.00 (reference)                      |
|                                               |                                       |                                       |
| <b>Spontaneous abortion</b>                   | <b>No. with outcome/total no. (%)</b> | <b>Hazard Ratio (95% CI)</b>          |
| <b>Exposure interval limited to day 0-154</b> |                                       |                                       |
| Fexofenadine                                  | 214/3227 (6.6%)                       | 0.87 (0.72-1.04)                      |
| Cetirizine                                    | 248/3255 (7.6%)                       | 1.00 (reference)                      |
| <b>Induced abortions</b>                      |                                       |                                       |
| Fexofenadine                                  | 605/4901 (12.3%)                      | 0.98 (0.88-1.10)                      |
| Cetirizine                                    | 610/4901 (12.5%)                      | 1.00 (reference)                      |



**eTable 9. Post-hoc analyses of the association between fexofenadine use during pregnancy and spontaneous abortion, preterm birth, small size for gestational age, and stillbirth according to ending exposure time interval prior to start of follow-up.**

| <b>Primary outcome</b>                  | <b>No. with outcome/total no. (%)</b> | <b>Hazard Ratio or Prevalence Odds Ratio (95% CI)<sup>a</sup></b> |
|-----------------------------------------|---------------------------------------|-------------------------------------------------------------------|
| <b>Spontaneous abortion<sup>b</sup></b> |                                       |                                                                   |
| Fexofenadine                            | 341/3082 (11.1%)                      | 0.94 (0.81-1.09)                                                  |
| Cetirizine                              | 357/3055 (11.7%)                      | 1.00 (reference)                                                  |
| <b>Secondary outcomes<sup>c</sup></b>   |                                       |                                                                   |
| <b>Preterm birth</b>                    |                                       |                                                                   |
| Fexofenadine                            | 279/3829 (7.3%)                       | 1.01 (0.85-1.20)                                                  |
| Cetirizine                              | 275/3807 (7.2%)                       | 1.00 (reference)                                                  |
| <b>Small size for gestational age</b>   |                                       |                                                                   |
| Fexofenadine                            | 382/3808 (10.0%)                      | 0.94 (0.81-1.08)                                                  |
| Cetirizine                              | 406/3810 (10.7%)                      | 1.00 (reference)                                                  |
| <b>Stillbirth</b>                       |                                       |                                                                   |
| Fexofenadine                            | 13/4842 (0.3%)                        | 0.60 (0.30-1.19)                                                  |
| Cetirizine                              | 22/4894 (0.5%)                        | 1.00 (reference)                                                  |

<sup>a</sup>Hazard ratio was estimated for the association with spontaneous abortion and stillbirth. Prevalence Odds Ratio was estimated for the association with preterm birth and small size for gestational age. <sup>b</sup>Exposure time interval was restricted to filled prescriptions before end of gestational week five. <sup>c</sup>Exposure time intervals were restricted to filled prescriptions before end of gestational week 22, which is the defined viability threshold in Denmark.

**eFigure.** Overview of the exposure and outcome time periods for the specific outcome analyses.

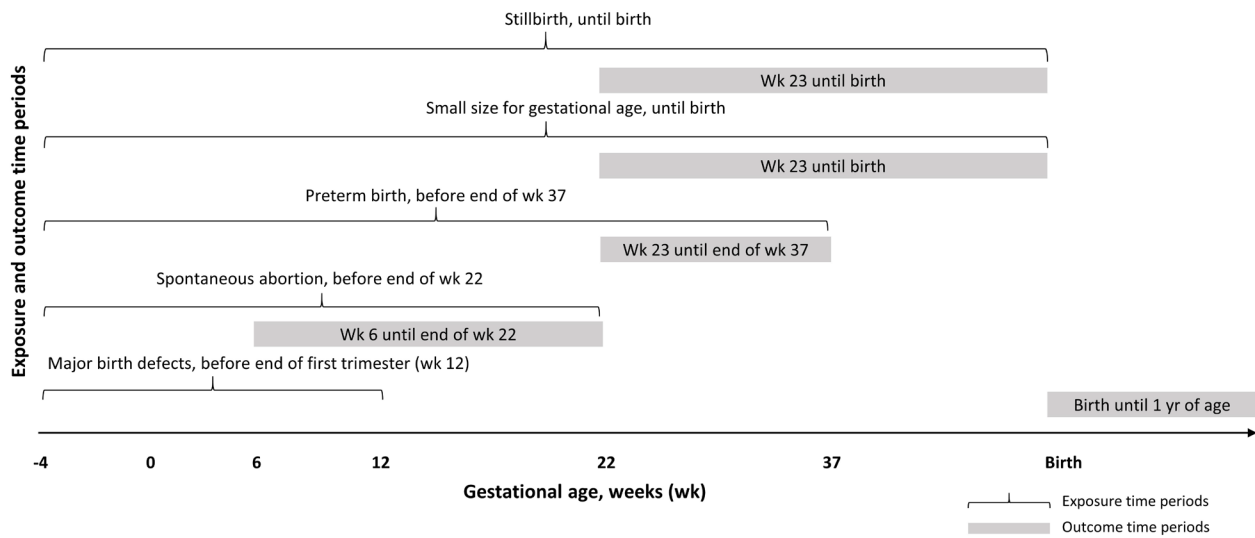

## eReferences

1. Wallach Kildemoes H, Toft Sørensen H, Hallas J. The Danish National Prescription Registry. *Scand J Public Health*. 2011;39(7\_suppl):38-41. doi:10.1177/1403494810394717
2. Knudsen LB, Olsen J. The Danish Medical Birth Registry. *Dan Med Bull*. 1998;45(3):320-323.
3. Lynge E, Sandegaard JL, Rebolj M. The Danish National Patient Register. *Scand J Public Health*. 2011;39(7\_suppl):30-33. doi:10.1177/1403494811401482
4. Pedersen CB. The Danish Civil Registration System. *Scand J Public Health*. 2011;39(7\_suppl):22-25. doi:10.1177/1403494810387965
5. EUROCAT Guide 1.4. Instructions for the registration and surveillance of congenital anomalies. Available at: [http://www.eurocat-network.eu/content/Full%20Guide%201%204%20version%2028\\_DEC2018.pdf](http://www.eurocat-network.eu/content/Full%20Guide%201%204%20version%2028_DEC2018.pdf). Retrieved May 16, 2019.
